# Supplementary material for: Feature-based classification of human transcription factors into hypothetical sub-classes related to regulatory function
Source: Springer Nature journal article supplement (doi:10.1186/s12859-016-1349-2), 2016-11-14
Supplement: 12859_2016_1349_MOESM1_ESM.pdf [file 12859_2016_1349_MOESM1_ESM.pdf]

## **Additional File 1**

R. Ehsani, S. Bahrami and F. Drabløs: Functional classification of human transcription factors based on structural properties

**Table S1** - Frequent Pfam domains in TF data

**Table S2** - DAVID analysis on experimentally identified subclasses of regulatory function

**Table S3** - AUC score for classifiers on each of the four cases

**Table S4** - AUC score and feature importance by RF classifier on individual properties

**Table S5** - Performance measures on individual properties using the RF classifier

**Table S6** - Significance of change in AUC score for stepwise addition of properties

**Table S7** - Classification of individual TFs  
(see Additional File 2)

**Table S8** - DAVID analysis on final classification data  
(see Additional File 3)

**Table S9** - GOrilla analysis on final classification data

**Table S10** - Number of significantly up- or down-regulated TFs at each time point

**Figure S1** - Log ratio of number of up-regulated versus down-regulated TFs

**Table S1** - Frequent Pfam domains in TF data

| <b>Pfam ID</b> | <b>Name</b>   | <b>Frequency</b> |
|----------------|---------------|------------------|
| PF13465        | Zf-H2C2_2     | 3466             |
| PF00096        | Zf-C2H2       | 347              |
| PF01352        | KRAB          | 237              |
| PF00046        | Homeobox      | 195              |
| PF13894        | Zf-C2H2_4     | 127              |
| PF13912        | Zf-C2H2_6     | 88               |
| PF00010        | HLH           | 74               |
| PF00104        | Hormone_recep | 47               |
| PF00105        | Zf-C4         | 45               |
| PF02023        | SCAN          | 44               |
| PF00250        | Fork_head     | 42               |
| PF00505        | HMG_box       | 42               |
| PF00651        | BTB           | 39               |
| PF00170        | Bzip_1        | 30               |
| PF13909        | Zf-H2C2_5     | 29               |
| PF00023        | Ank           | 26               |
| PF00178        | Ets           | 25               |
| PF00412        | LIM           | 22               |
| PF00628        | PHD           | 22               |
| PF01530        | Zf-C2HC       | 21               |

**Table S2** - DAVID analysis on experimentally identified subclasses of regulatory function

| <b>Subclass</b>  | <b>Category</b> | <b>Term</b>                                   | <b>Count</b> | <b>%</b> | <b>P-value</b> | <b>Benjamini</b> |
|------------------|-----------------|-----------------------------------------------|--------------|----------|----------------|------------------|
| Pioneer          | INTERORP        | Zinc finger, C2H2-type/integrase, DNA-binding | 10           | 22.7     | 1.8E-4         | 2.0E-3           |
|                  | SP_PIR_KEYWORDS | Activator                                     | 27           | 61.4     | 3.9E-4         | 1.7E-2           |
|                  | GOTERM_MF_FAT   | Transcription cofactor activity               | 14           | 31.8     | 1.6E-3         | 7.6E-2           |
|                  | PFAM            | Ets                                           | 22           | 50.0     | 2.6E-21        | 1.5E-19          |
|                  | PFAM            | SAM_PNT                                       | 7            | 15.9     | 3.6E-5         | 6.9E-4           |
| PFAM             | zf-C2H2         | 11                                            | 25.0         | 1.7E-3   | 2.5E-2         |                  |
| Settler          | UP_SEQ_FEATURE  | DNA-binding region: Basic motif               | 30           | 65.2     | 1.8E-20        | 3.0E-18          |
|                  | SP_PIR_KEYWORDS | Transmembrane                                 | 8            | 17.4     | 1.9E-6         | 5.9E-5           |
|                  | SP_PIR_KEYWORDS | Activator                                     | 29           | 63.0     | 1.1E-4         | 1.7E-3           |
|                  | SP_PIR_KEYWORDS | Unfolded protein response                     | 5            | 10.9     | 4.0E-4         | 5.0E-3           |
|                  | PFAM            | HLH                                           | 22           | 47.8     | 2.3E-18        | 1.2E-16          |
| PFAM             | bZIP_1          | 7                                             | 15.2         | 9.6E-5   | 1.7E-3         |                  |
| Positive Migrant | SP_PIR_KEYWORDS | Receptor                                      | 45           | 57.9     | 4.5E-36        | 3.3E-34          |
|                  | GOTERM_MF_FAT   | Steroid hormone receptor activity             | 44           | 57.9     | 4.9E-36        | 4.6E-34          |
|                  | GOTERM_MF_FAT   | Transcription activator activity              | 34           | 44.7     | 2.8E-5         | 3.7E-4           |
|                  | SP_PIR_KEYWORDS | Phosphoprotein                                | 45           | 59.2     | 3.7E-5         | 3.8E-4           |
|                  | GOTERM_MF_FAT   | Transcription coactivator activity            | 15           | 19.7     | 2.2E-4         | 2.6E-3           |
|                  | GOTERM_MF_FAT   | Transcription factor binding                  | 29           | 38.2     | 2.4E-4         | 2.5E-3           |
|                  | PFAM            | Hormone_recep                                 | 43           | 56.6     | 6.9E-35        | 2.6E-33          |
| PFAM             | zf-C4           | 42                                            | 55.3         | 7.7E-34  | 1.9E-32        |                  |
| Negative Migrant | GOTERM_MF_FAT   | Sequence-specific DNA binding                 | 260          | 90.3     | 1.3E-10        | 8.6E-9           |
|                  | COG_ONTOLOGY    | Transcription                                 | 16           | 5.6      | 1.0E-6         | 1.0E-6           |
|                  | GOTERM_MF_FAT   | Transcription factor activity                 | 279          | 96.9     | 6.7E-5         | 2.3E-3           |
|                  | PFAM            | Homeobox                                      | 192          | 66.7     | 2.2E-48        | 2.6E-46          |
|                  | PFAM            | Fork_head                                     | 39           | 13.5     | 1.7E-7         | 6.7E-6           |

**Table S3** - AUC score for classifiers on each of the four cases

| Methods    | Pioneers<br>vs Rest | Settlers<br>vs Rest | Migrants+<br>vs Rest | Migrants-<br>vs Rest |
|------------|---------------------|---------------------|----------------------|----------------------|
| RF         | <i>0.830</i>        | <i>0.801</i>        | <i>0.804</i>         | <i>0.903</i>         |
| SVC_Linear | 0.818               | 0.793               | 0.786                | 0.890                |
| SVC_RBF    | 0.824               | 0.798               | 0.800                | 0.896                |
| SVC_Poly   | 0.503               | 0.506               | 0.506                | 0.503                |
| kNN        | <i>0.825</i>        | 0.788               | <i>0.806</i>         | 0.888                |
| DT         | 0.808               | 0.771               | 0.791                | <i>0.901</i>         |
| GNB        | 0.815               | <i>0.800</i>        | 0.774                | 0.856                |

The two best scores for each case are shown in *italics*. The methods are Random Forest (RF), Support Vector Classifier with Linear (SVC\_Linear), Radial Basis Function (SVC\_RBF) and Polynomial (SVC\_Poly) kernels, k Nearest Neighbours (kNN), Decision Tree (DT), and Gaussian Naïve Bayes (GNB).

**Table S4** - AUC score and feature importance by RF classifier on individual properties.

| Properties | Pioneers<br>vs Rest |                       | Settlers<br>vs Rest |                       | Migrants+<br>vs Rest |                       | Migrants-<br>vs Rest |                       |
|------------|---------------------|-----------------------|---------------------|-----------------------|----------------------|-----------------------|----------------------|-----------------------|
|            | AUC<br>score        | Feature<br>importance | AUC<br>score        | Feature<br>importance | AUC<br>score         | Feature<br>importance | AUC<br>score         | Feature<br>importance |
| TF_Class   | <i>0.824</i>        | <i>0.414</i>          | <i>0.798</i>        | <i>0.517</i>          | <i>0.791</i>         | <i>0.454</i>          | <i>0.909</i>         | <i>0.533</i>          |
| PD         | <i>0.825</i>        | <i>0.351</i>          | <i>0.803</i>        | <i>0.256</i>          | <i>0.804</i>         | <i>0.286</i>          | <i>0.868</i>         | <i>0.308</i>          |
| Ind_PTM    | 0.520               | <i>0.122</i>          | 0.494               | <i>0.118</i>          | <i>0.603</i>         | <i>0.161</i>          | <i>0.612</i>         | <i>0.110</i>          |
| N_PPI      | 0.504               | 0.040                 | 0.575               | 0.053                 | 0.599                | 0.049                 | 0.536                | 0.019                 |
| N_ZFD      | <i>0.591</i>        | 0.028                 | 0.502               | 0.009                 | 0.491                | 0.005                 | 0.512                | 0.009                 |
| PPI        | 0.508               | 0.019                 | <i>0.582</i>        | 0.028                 | 0.570                | 0.021                 | 0.506                | 0.008                 |
| PTM        | 0.498               | 0.006                 | 0.490               | 0.007                 | 0.532                | 0.008                 | 0.525                | 0.004                 |
| DBD        | 0.495               | 0.008                 | 0.502               | 0.004                 | 0.499                | 0.005                 | 0.498                | 0.002                 |
| N_DBD      | 0.504               | 0.007                 | 0.497               | 0.002                 | 0.499                | 0.005                 | 0.500                | 0.002                 |
| N_PhS      | 0.525               | 0.000                 | 0.496               | 0.000                 | 0.536                | 0.000                 | 0.547                | 0.000                 |

The three best scores for each case are shown in *italics*. The individual properties are explained in Table 1.

**Table S5** - Performance measures on individual properties using the RF classifier.**a) Pioneer vs rest**

| Property | PPV   | SN    | F-Score | TP-ave | FP-ave | TN-ave | FN-ave | MCC    | AUC   |
|----------|-------|-------|---------|--------|--------|--------|--------|--------|-------|
| TFCClass | 0.844 | 0.804 | 0.801   | 7.19   | 1.44   | 7.56   | 1.80   | 0.651  | 0.824 |
| PD       | 0.854 | 0.800 | 0.799   | 7.16   | 1.44   | 7.57   | 1.83   | 0.658  | 0.825 |
| N_ZFD    | 0.692 | 0.349 | 0.379   | 3.00   | 1.65   | 7.35   | 5.99   | 0.232  | 0.591 |
| DBD      | 0.195 | 0.420 | 0.261   | 3.48   | 4.18   | 4.83   | 5.51   | -0.018 | 0.495 |
| N-DBD    | 0.298 | 0.360 | 0.247   | 2.94   | 3.46   | 5.54   | 6.05   | 0.018  | 0.504 |
| PPI      | 0.394 | 0.406 | 0.347   | 3.42   | 3.70   | 5.31   | 5.58   | 0.019  | 0.508 |
| N-PPI    | 0.420 | 0.393 | 0.340   | 3.34   | 3.62   | 5.38   | 5.65   | 0.009  | 0.504 |
| N_PhS    | 0.502 | 0.440 | 0.411   | 3.84   | 3.64   | 5.36   | 5.15   | 0.059  | 0.525 |
| PTM      | 0.257 | 0.467 | 0.308   | 3.90   | 4.52   | 4.49   | 5.50   | -0.008 | 0.498 |
| Ind-PTM  | 0.518 | 0.433 | 0.428   | 3.80   | 3.61   | 5.39   | 5.19   | 0.040  | 0.520 |

**b) Settler vs rest**

| Property | PPV   | SN    | F-Score | TP-ave | FP-ave | TN-ave | FN-ave | MCC    | AUC   |
|----------|-------|-------|---------|--------|--------|--------|--------|--------|-------|
| TFCClass | 0.825 | 0.784 | 0.778   | 7.16   | 1.70   | 7.16   | 1.99   | 0.604  | 0.798 |
| PD       | 0.811 | 0.833 | 0.794   | 7.66   | 2.00   | 6.58   | 1.49   | 0.624  | 0.803 |
| N_ZFD    | 0.332 | 0.458 | 0.323   | 4.04   | 4.18   | 4.67   | 5.10   | 0.006  | 0.502 |
| DBD      | 0.327 | 0.450 | 0.309   | 3.94   | 4.14   | 4.71   | 5.21   | 0.006  | 0.502 |
| N-DBD    | 0.255 | 0.464 | 0.305   | 4.07   | 4.34   | 4.51   | 5.08   | -0.010 | 0.497 |
| PPI      | 0.467 | 0.770 | 0.568   | 6.94   | 5.43   | 3.42   | 2.21   | 0.204  | 0.582 |
| N-PPI    | 0.467 | 0.776 | 0.570   | 6.98   | 5.63   | 3.22   | 2.16   | 0.186  | 0.575 |
| N_PhS    | 0.463 | 0.482 | 0.419   | 4.34   | 4.42   | 4.43   | 4.81   | -0.007 | 0.496 |
| PTM      | 0.329 | 0.513 | 0.354   | 4.55   | 4.68   | 3.99   | 4.60   | -0.028 | 0.490 |
| Ind-PTM  | 0.505 | 0.473 | 0.451   | 4.31   | 4.37   | 4.48   | 4.84   | -0.010 | 0.494 |

**c) Positive Migrant vs rest**

| Property | PPV   | SN    | F-Score | TP-ave | FP-ave | TN-ave | FN-ave | MCC    | AUC   |
|----------|-------|-------|---------|--------|--------|--------|--------|--------|-------|
| TFCClass | 0.819 | 0.757 | 0.772   | 11.51  | 2.62   | 12.14  | 3.74   | 0.558  | 0.791 |
| PD       | 0.816 | 0.810 | 0.792   | 12.30  | 3.03   | 11.72  | 2.94   | 0.618  | 0.804 |
| N_ZFD    | 0.370 | 0.504 | 0.351   | 7.44   | 7.98   | 6.77   | 7.81   | -0.027 | 0.491 |
| DBD      | 0.336 | 0.525 | 0.353   | 7.74   | 8.05   | 6.70   | 7.51   | -0.003 | 0.499 |
| N-DBD    | 0.332 | 0.507 | 0.341   | 7.46   | 7.79   | 6.96   | 7.78   | -0.003 | 0.499 |
| PPI      | 0.588 | 0.475 | 0.485   | 7.12   | 5.06   | 9.69   | 8.13   | 0.148  | 0.570 |
| N-PPI    | 0.678 | 0.458 | 0.498   | 6.91   | 3.92   | 10.38  | 8.34   | 0.222  | 0.599 |
| N_PhS    | 0.514 | 0.616 | 0.499   | 9.20   | 8.20   | 6.55   | 6.05   | 0.103  | 0.536 |
| PTM      | 0.365 | 0.683 | 0.469   | 10.20  | 9.34   | 5.41   | 5.05   | 0.101  | 0.532 |
| Ind-PTM  | 0.637 | 0.524 | 0.544   | 7.94   | 4.75   | 10.00  | 7.30   | 0.213  | 0.603 |

**d) Negative Migrant vs rest**

| Property | PPV   | SN    | F-Score | TP-ave | FP-ave | TN-ave | FN-ave | MCC    | AUC   |
|----------|-------|-------|---------|--------|--------|--------|--------|--------|-------|
| TFCClass | 0.906 | 0.903 | 0.902   | 26.71  | 2.79   | 30.13  | 2.87   | 0.819  | 0.909 |
| PD       | 0.934 | 0.795 | 0.852   | 23.45  | 1.93   | 30.99  | 6.13   | 0.753  | 0.868 |
| N_ZFD    | 0.142 | 0.304 | 0.192   | 8.30   | 9.87   | 23.05  | 21.28  | 0.045  | 0.512 |
| DBD      | 0.051 | 0.118 | 0.071   | 3.12   | 4.38   | 28.54  | 26.46  | -0.006 | 0.498 |
| N-DBD    | 0.082 | 0.151 | 0.094   | 4.06   | 5.37   | 27.55  | 25.52  | 0.000  | 0.500 |
| PPI      | 0.152 | 0.233 | 0.176   | 6.42   | 7.69   | 25.23  | 23.16  | 0.011  | 0.506 |
| N-PPI    | 0.603 | 0.281 | 0.266   | 7.83   | 7.23   | 25.69  | 21.75  | 0.117  | 0.536 |
| N_PhS    | 0.577 | 0.334 | 0.346   | 9.73   | 8.02   | 24.90  | 19.85  | 0.127  | 0.547 |
| PTM      | 0.584 | 0.125 | 0.182   | 3.64   | 2.52   | 30.40  | 25.94  | 0.083  | 0.525 |
| Ind-PTM  | 0.576 | 0.650 | 0.596   | 19.03  | 14.13  | 18.79  | 10.55  | 0.227  | 0.612 |

**Table S6** - Significance of change in AUC score for stepwise addition of properties.

| Pioneers vs Rest          |          |          |          |        |        |        |        |        |         |         |
|---------------------------|----------|----------|----------|--------|--------|--------|--------|--------|---------|---------|
| Properties                | TF_Class | PD       | N_PPI    | N_DBD  | N_ZFD  | DBD    | PPI    | PTM    | Ind_PTM | N_PhS   |
| AUC-Score                 | 0.8223   | 0.8315   | 0.8404   | 0.8459 | 0.8444 | 0.8456 | 0.8430 | 0.8451 | 0.8373  | 0.8330  |
| P-value                   |          | 0.0008   | 0.0004   | 0.0229 | 0.4139 | 0.8206 | 0.1055 | 0.1378 | 0.0122  | 0.0395  |
| Settlers vs Rest          |          |          |          |        |        |        |        |        |         |         |
| Properties                | PD       | N_PPI    | TF_Class | PTM    | N_DBD  | N_ZFD  | N_PhS  | PPI    | DBD     | Ind_PTM |
| AUC-Score                 | 0.8002   | 0.8180   | 0.8224   | 0.8211 | 0.8220 | 0.8251 | 0.8230 | 0.8168 | 0.8129  | 0.8024  |
| P-value                   |          | 6.3e-06  | 0.0222   | 0.8165 | 0.4149 | 0.3442 | 0.3659 | 0.0197 | 0.0258  | 0.0040  |
| Positive Migrants vs Rest |          |          |          |        |        |        |        |        |         |         |
| Properties                | PD       | TF_Class | N_ZFD    | PPI    | DBD    | N_DBD  | PTM    | N_PPI  | Ind_PTM | N_PhS   |
| AUC-Score                 | 0.8053   | 0.8238   | 0.8290   | 0.8269 | 0.8280 | 0.8241 | 0.8133 | 0.8059 | 0.7993  | 0.8039  |
| P-value                   |          | 1.0e-05  | 0.0365   | 0.5172 | 0.6968 | 0.0438 | 0.0003 | 0.0232 | 0.0586  | 0.7215  |
| Negative Migrants vs Rest |          |          |          |        |        |        |        |        |         |         |
| Properties                | TF_Class | PD       | PTM      | N_ZFD  | N_DBD  | DBD    | PPI    | N_PhS  | N_PPI   | Ind_PTM |
| AUC-Score                 | 0.9063   | 0.9131   | 0.9157   | 0.9172 | 0.9176 | 0.9139 | 0.9101 | 0.9117 | 0.9071  | 0.8946  |
| P-value                   |          | 0.0182   | 0.3988   | 0.1448 | 0.8565 | 0.0351 | 0.2052 | 0.0940 | 0.0475  | 0.0004  |

**Table S7** - Classification of individual TFs  
(see Additional File 2)

The classification is shown as Chromatin Opening Type. The experimentally determined classifications used for training the classifiers are shown in lowercase (e.g. Pioneer), whereas the classifications described here are shown in UPPERCASE (e.g. PIONEER).



**Table S8** - DAVID analysis on final classification data.  
(see Additional File 3)

The table contains the full output from Functional Annotation Clustering in DAVID for Pioneers, Settlers, positive Migrants and negative Migrants, using the set of 1175 TFs as background. It also contains the output for the Unclassified TFs, using the full set of 1978 TFs as background.

**Table S9** - GOrilla analysis on final classification data.

| <b>GO term</b>           | <b>Description</b>                                                                   | <b>P-value</b> | <b>q-value</b> | <b>Enrichment</b> |
|--------------------------|--------------------------------------------------------------------------------------|----------------|----------------|-------------------|
| <b>Pioneers</b>          |                                                                                      |                |                |                   |
| GO:0043169               | cation binding                                                                       | 2.11E-50       | 1.05E-47       | 1.63              |
| GO:0046872               | metal ion binding                                                                    | 2.11E-50       | 5.25E-48       | 1.63              |
| GO:0043167               | ion binding                                                                          | 5.01E-49       | 8.32E-47       | 1.61              |
| GO:1901363               | heterocyclic compound binding                                                        | 2.12E-04       | 2.64E-02       | 1.02              |
| GO:0003676               | nucleic acid binding                                                                 | 2.12E-04       | 2.11E-02       | 1.02              |
| GO:0097159               | organic cyclic compound binding                                                      | 2.12E-04       | 1.76E-02       | 1.02              |
| <b>Settlers</b>          |                                                                                      |                |                |                   |
| GO:0046983               | protein dimerization activity                                                        | 1.04E-19       | 5.19E-17       | 2.33              |
| GO:0070888               | E-box binding                                                                        | 1.93E-13       | 4.80E-11       | 4.46              |
| GO:0035497               | cAMP response element binding                                                        | 3.51E-07       | 5.83E-05       | 4.93              |
| GO:0008134               | transcription factor binding                                                         | 2.19E-05       | 2.73E-03       | 1.62              |
| GO:0005515               | protein binding                                                                      | 5.29E-05       | 5.27E-03       | 1.19              |
| GO:0000988               | transcription factor activity, protein binding                                       | 1.20E-04       | 9.99E-03       | 1.53              |
| GO:0000989               | transcription factor activity, transcription factor binding                          | 3.12E-04       | 2.22E-02       | 1.50              |
| GO:0043425               | bHLH transcription factor binding                                                    | 7.27E-04       | 4.53E-02       | 2.86              |
| <b>positive Migrants</b> |                                                                                      |                |                |                   |
| GO:0004872               | receptor activity                                                                    | 7.24E-25       | 3.61E-22       | 3.69              |
| GO:0038023               | signaling receptor activity                                                          | 7.24E-25       | 1.8E-22        | 3.69              |
| GO:0003707               | steroid hormone receptor activity                                                    | 1.62E-24       | 2.68E-22       | 3.75              |
| GO:0004871               | signal transducer activity                                                           | 5.75E-24       | 7.16E-22       | 3.27              |
| GO:0060089               | molecular transducer activity                                                        | 5.75E-24       | 5.73E-22       | 3.27              |
| GO:0098531               | transcription factor activity, direct ligand regulated sequence-specific DNA binding | 2.13E-21       | 1.52E-19       | 3.71              |
| GO:0046914               | transition metal ion binding                                                         | 1.09E-18       | 6.77E-17       | 2.27              |
| GO:0008270               | zinc ion binding                                                                     | 8.41E-18       | 4.65E-16       | 2.25              |
| GO:0043167               | ion binding                                                                          | 6.15E-17       | 3.06E-15       | 1.39              |
| GO:0043169               | cation binding                                                                       | 4.17E-15       | 1.89E-13       | 1.37              |
| GO:0046872               | metal ion binding                                                                    | 4.17E-15       | 1.73E-13       | 1.37              |
| GO:0008289               | lipid binding                                                                        | 1.41E-09       | 5.39E-08       | 3.40              |
| GO:0005496               | steroid binding                                                                      | 5.91E-07       | 2.10E-05       | 3.54              |
| GO:0043168               | anion binding                                                                        | 7.38E-07       | 2.45E-05       | 3.22              |
| GO:0036094               | small molecule binding                                                               | 3.29E-06       | 1.02E-04       | 2.72              |
| GO:0003708               | retinoic acid receptor activity                                                      | 4.99E-05       | 1.46E-03       | 4.08              |
| GO:0042974               | retinoic acid receptor binding                                                       | 9.75E-05       | 2.70E-03       | 3.34              |
| GO:0004887               | thyroid hormone receptor activity                                                    | 2.07E-04       | 5.43E-03       | 4.08              |
| GO:0008144               | drug binding                                                                         | 2.07E-04       | 5.16E-03       | 4.08              |
| GO:0046965               | retinoid X receptor binding                                                          | 3.35E-04       | 7.94E-03       | 3.27              |
| GO:0005102               | receptor binding                                                                     | 4.08E-04       | 9.24E-03       | 1.83              |
| <b>negative Migrants</b> |                                                                                      |                |                |                   |
| GO:0043565               | sequence-specific DNA binding                                                        | 1.68E-29       | 8.39E-27       | 1.43              |
| GO:0003682               | chromatin binding                                                                    | 2.03E-05       | 3.37E-03       | 1.45              |
| GO:0044877               | macromolecular complex binding                                                       | 3.26E-05       | 3.25E-03       | 1.42              |
| GO:0071837               | HMG box domain binding                                                               | 5.38E-05       | 4.46E-03       | 2.67              |
| GO:0019904               | protein domain specific binding                                                      | 6.40E-04       | 3.98E-02       | 1.66              |
| GO:0001105               | RNA polymerase II transcription coactivator act.                                     | 9.53E-04       | 5.27E-02       | 2.40              |

The analysis used the 1175 classified TFs as background.

**Table S10** - Number of significantly up- or down-regulated TFs at each time point.

| Time   | Pioneer |      | Settler |      | Migrant+ |      | Migrant- |      |
|--------|---------|------|---------|------|----------|------|----------|------|
|        | Up      | Down | Up      | Down | Up       | Down | Up       | Down |
| 00h15m | 3       | 0    | 2       | 0    | 3        | 0    | 0        | 0    |
| 00h30m | 9       | 0    | 5       | 0    | 10       | 0    | 2        | 0    |
| 00h45m | 11      | 0    | 11      | 0    | 13       | 0    | 3        | 0    |
| 01h00m | 13      | 0    | 11      | 1    | 16       | 0    | 8        | 2    |
| 01h20m | 19      | 5    | 14      | 3    | 21       | 1    | 17       | 4    |
| 01h40m | 17      | 19   | 11      | 10   | 17       | 10   | 15       | 10   |
| 02h00m | 18      | 6    | 13      | 9    | 22       | 6    | 14       | 12   |
| 02h30m | 17      | 6    | 13      | 12   | 19       | 7    | 11       | 9    |
| 03h00m | 18      | 4    | 15      | 13   | 20       | 8    | 12       | 12   |
| 03h30m | 14      | 5    | 15      | 12   | 18       | 9    | 13       | 14   |
| 04h00m | 10      | 8    | 12      | 15   | 17       | 13   | 13       | 16   |
| 05h00m | 14      | 8    | 18      | 15   | 17       | 15   | 11       | 14   |
| 06h00m | 13      | 10   | 9       | 16   | 16       | 12   | 12       | 14   |
| 07h00m | 13      | 22   | 13      | 17   | 11       | 16   | 7        | 20   |
| 08h00m | 15      | 25   | 15      | 23   | 18       | 29   | 11       | 20   |
| 12h00m | 12      | 16   | 11      | 27   | 16       | 18   | 7        | 23   |
| 16h00m | 12      | 28   | 10      | 23   | 11       | 29   | 8        | 23   |
| 24h00m | 10      | 29   | 9       | 36   | 13       | 35   | 10       | 32   |
| 42h00m | 21      | 27   | 14      | 33   | 22       | 41   | 9        | 31   |
| 60h00m | 18      | 22   | 15      | 32   | 21       | 29   | 11       | 33   |

**Figure S1** - Log ratio of number of up-regulated versus down-regulated TFs.

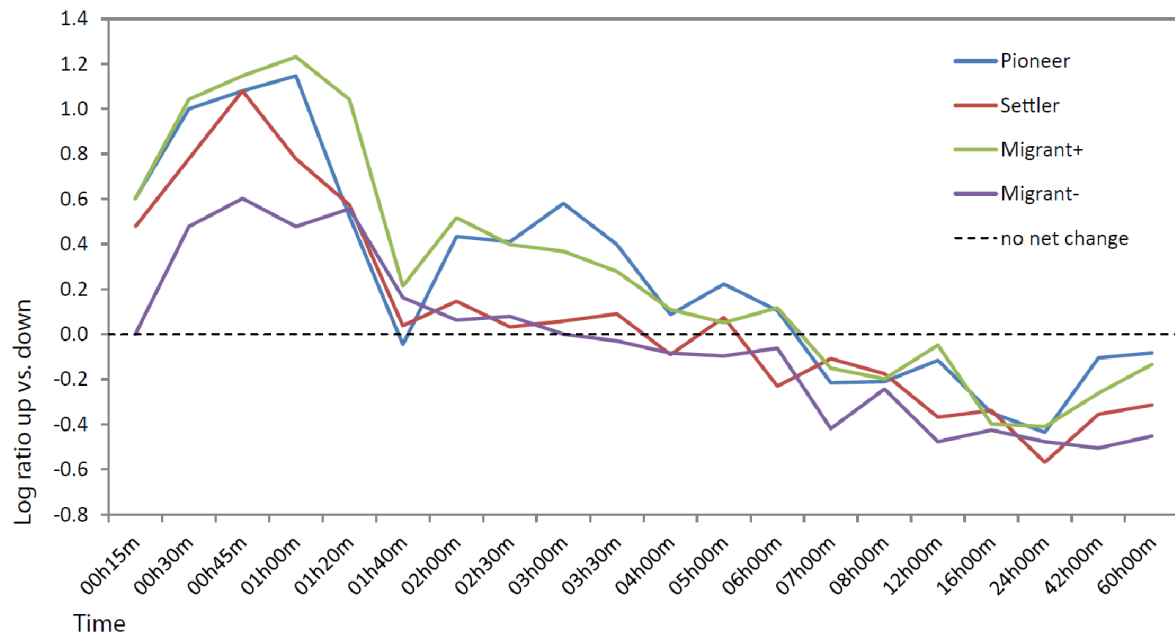

The graph shows the log ratio of number of significantly up-regulated genes versus number of down-regulated genes at each time point for each class of regulatory function. The different classes show similar trends, indicating that they are needed in combination for activation of new genes, at least within the time resolution provided by the experimental data.
